# Supplementary material
Source: PubMed Central journal article supplement (PMC7724527)
Supplement: sj-pdf-1-ueg-10.1177_2050640620943089.pdf [file sj-pdf-1-ueg-10.1177_2050640620943089.pdf]

## MRe protocol

|                                 | T2 HASTE FS               | DWI<br>(B values: 0 and 900 s/mm <sup>2</sup> ) | True FISP cine | T2 HASTE with/without FS | True FISP | True FISP | T1 VIBE FS |
|---------------------------------|---------------------------|-------------------------------------------------|----------------|--------------------------|-----------|-----------|------------|
| <b>Plane</b>                    | axial                     | axial                                           | coronal        | coronal                  | coronal   | axial     | coronal    |
| <b>Slices thickness</b><br>(mm) | 8                         | 8                                               | 6              | 5                        | 5         | 8         | 3          |
| <b>FOV</b><br>(mm)              | 380                       | 360                                             | 450            | 450                      | 450       | 380       | 450        |
| <b>TR</b><br>(ms)               | 1000                      | 7100                                            | 42.6           | 1200                     | 4.30      | 4.30      | 3.23       |
| <b>TE</b><br>(ms)               | 92                        | 89                                              | 1.2            | 92                       | 2.15      | 1.78      | 1.24       |
| <b>Flip angle</b>               | 160                       | 90                                              | 78             | 170                      | 60        | 60        | 10         |
|                                 | before N-butylscopolamine |                                                 |                | after N-butylscopolamine |           |           |            |

HASTE: half-fourier-acquired single-shot turbo spin echo; FS: fat suppressed; TrueFISP: true fast imaging with steady state precession; DWI: diffusion weighted imaging; VIBE: volumetric interpolated breath-hold examination; FOV: field-of-view; TR: repetition time; TE: echo time.
